# Supplementary material for: Bilayer aggregate microstructure determines viscoelasticity of lung surfactant suspensions
Source: Royal Society of Chemistry journal article supplement (doi:10.1039/d1sm00337b), 2021-01-01

## Bilayer Aggregate Microstructure Determines Viscoelasticity of Lung Surfactant Suspensions

Clara O. Ciutara and Joseph A. Zasadzinski

### Supplemental Information

**Figure S1.** Strain amplitude sweep for linear oscillatory shear experiments. The critical strain is determined as being the strain amplitude that causes the maximum  $G'$  to decrease 10%.

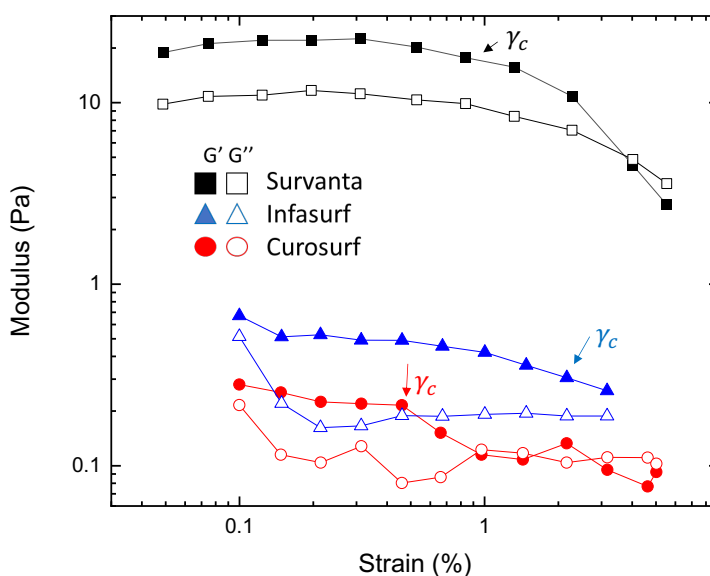

**Figure S2.** Centrifuged suspensions of Survanta, Infasurf, and Curosurf, with and without polyethylene glycol (PEG). Before PEG, all three suspensions had similar volume fractions of 40 – 50% of the yellow lipid aggregates. Following PEG additions, the volume fraction decreased significantly due to the combination of dehydration of the lipid bilayers and the depletion attraction induced flocculation.

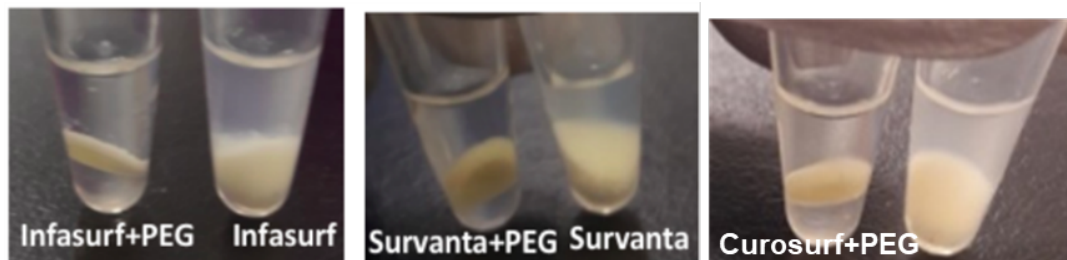

**Figure S3.** Measured viscosity of saline and saline with 5% PEG.

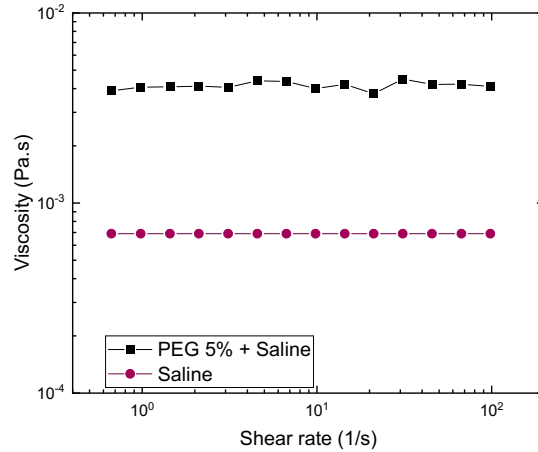

**Figure S4.** Differential Scanning Calorimetry of (i) Survanta, (ii) Infasurf, (iii) Curosurf. Survanta shows a broad endothermic peak from 50 – 55 C due to the stabilizing effect of palmitic acid on the dipalmitoylphosphatidylcholine gel phase. Infasurf has a very broad, small endotherm from about 28 – 40 C. Curosurf has a broad peak similar to Survanta but from 25-30 C.

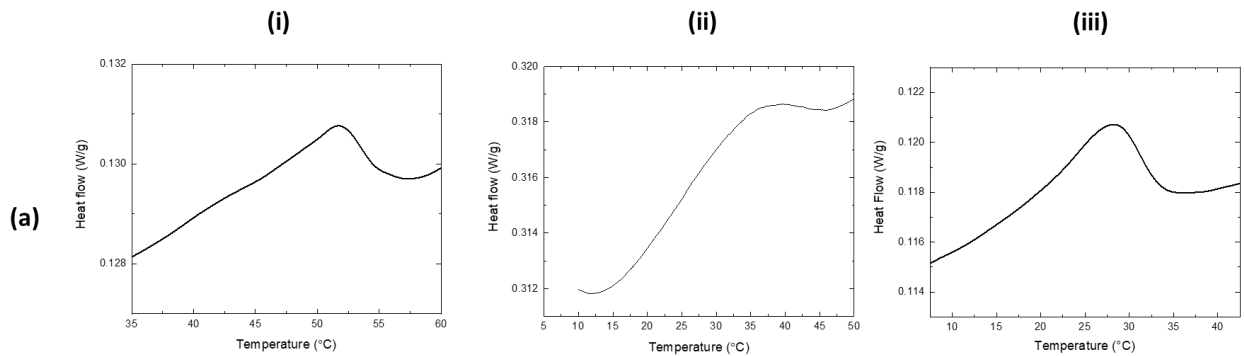

Supplement: d1sm00337b1.pdf [file d1sm00337b1.pdf]
